# Supplementary material
Source: publisher figshare collection journal article supplement (https://geolsoc.figshare.com/ndownloader/files/5423696)
Supplement: Supplementary file 1 [file 5423696]

Standard	MgO_avg	MgO_rec	MgO_std	MgO_RSD	MgO_RD	Al2O3_avg	Al2O3_rec	Al2O3_std	Al2O3_RSD	Al2O3_RD	SiO2_avg	SiO2_rec	SiO2_std	SiO2_RSD	SiO2_RD	P2O5_avg	P2O5_rec	P2O5_std	P2O5_RSD	P2O5_RD	S_avg	S_rec	S_std	S_RSD	S_RD	Cl_avg	Cl_rec	Cl_std	Cl_RSD	Cl_RD	K2O_avg	K2O_rec	K2O_std	K2O_RSD	K2O_RD	CaO_avg	CaO_rec	CaO_std	CaO_RSD	CaO_RD	TiO2_avg	TiO2_rec	TiO2_std	TiO2_RSD	TiO2_RD	MnO_avg	MnO_rec	MnO_std	MnO_RSD
AGV-2	6.37	1.79	1.70	26.76	255.74	16.26	16.91	0.34	2.09	-3.87	64.49	59.30	0.95	1.47	8.75	0.40	0.48	0.02	3.79	-17.01	<LOD	-	-	-	-	<LOD	75.00	-	-	-	2.69	2.88	0.03	1.12	-6.51	5.04	5.20	0.05	1.03	-3.08	1.38	1.05	0.04	2.71	31.87	0.10	0.10	0.00	3.95
BAMAP-01	9.37	8.18	2.14	22.83	14.50	16.22	15.24	0.40	2.47	6.41	51.21	47.91	0.96	1.88	6.88	0.44	0.45	0.02	4.07	-1.33	<LOD	0.01	-	-	-	<LOD	-	-	-	-	1.24	1.57	0.02	1.54	-21.31	7.94	8.33	0.13	1.61	-4.74	2.42	2.31	0.05	2.01	4.71	0.13	0.16	0.00	3.62
BCR-2	5.64	3.59	1.41	25.05	57.19	13.96	13.50	0.32	2.29	3.39	57.10	54.10	0.98	1.72	5.55	0.27	0.35	0.01	4.86	-23.26	<LOD	160.00	-	-	-	<LOD	98.00	-	-	-	1.51	1.79	0.02	1.22	-15.92	6.49	7.12	0.07	1.06	-8.86	2.51	2.26	0.05	1.90	11.20	0.16	0.20	0.00	2.80
BIR-1a	8.19	9.70	1.51	18.47	-15.54	19.36	15.40	0.36	1.84	25.68	48.82	47.70	0.62	1.28	2.34	<LOD	0.03				<LOD	70.00	-	-	-	<LOD	26.00	-	-	-	<LOD	0.03	-	-	-	12.53	13.40	0.27	2.16	-6.52	1.16	0.97	0.03	2.71	19.11	0.14	0.18	0.00	3.44
CHA-2	6.92	2.46	1.49	21.52	181.32	18.01	17.75	0.45	2.50	1.45	67.87	60.42	1.19	1.75	12.33	0.17	0.22	0.01	7.75	-24.56	<LOD	<0.01	-	-	-	<LOD	-	-	-	-	1.82	2.02	0.02	1.30	-9.70	5.92	5.88	0.07	1.18	0.63	0.99	0.72	0.03	3.07	37.12	0.10	0.10	0.00	4.28
DNC-1a	10.46	10.13	2.11	20.17	3.27	19.74	18.34	0.70	3.57	7.64	47.46	47.15	1.78	3.75	0.66	<LOD	0.07	-	-	-	<LOD	-	-	-	-	<LOD	60.00	-	-	-	<LOD	0.23	-	-	-	10.61	11.49	0.51	4.77	-7.64	0.72	0.48	0.02	3.37	50.40	0.13	0.15	0.01	4.24
GSP-2	7.53	0.96	2.03	26.95	684.18	14.90	14.90	0.34	2.27	-0.01	71.46	66.60	1.14	1.60	7.29	0.20	0.29	0.01	4.46	-30.69	<LOD	-	-	-	-	<LOD	-	-	-	-	5.63	5.38	0.07	1.18	4.59	1.75	2.10	0.03	1.74	-16.47	1.11	0.66	0.03	2.57	67.64	0.06	-	0.00	7.00
JG-1A	7.66	0.69	1.68	21.95	1009.77	14.30	14.22	0.29	2.05	0.55	77.97	72.19	1.11	1.43	8.00	<LOD	0.08	-	-	-	<LOD	10.00	-	-	-	<LOD	58.10	-	-	-	4.16	3.96	0.04	0.99	3.63	1.92	2.13	0.03	1.54	-10.08	0.57	0.25	0.03	4.54	126.20	0.06	0.06	0.00	4.20
JR-3	7.08	0.05	1.76	24.89	14052.35	12.59	12.10	0.30	2.35	4.04	80.60	72.48	1.33	1.65	11.21	0.08	0.01	0.01	11.65	807.35	<LOD	39.00	-	-	-	<LOD	-	-	-	-	4.49	4.33	0.05	1.19	3.72	<LOD	0.09	-	-	-	0.47	0.21	0.02	4.74	124.68	0.09	0.09	0.00	3.68
MRG-1	12.83	13.55	2.87	22.38	-5.35	8.09	8.47	0.24	2.91	-4.49	41.89	39.12	0.65	1.55	7.07	<LOD	0.08	-	-	-	<LOD	610.00	-	-	-	<LOD	170.00	-	-	-	<LOD	0.18	-	-	-	14.21	14.70	0.29	2.07	-3.35	3.72	3.77	0.08	2.08	-1.31	0.14	0.17	0.00	3.42
PER-1	8.37	0.35	1.83	21.85	2291.65	13.10	12.53	0.36	2.74	4.58	88.19	75.09	1.47	1.66	17.45	<LOD	0.03	-	-	-	<LOD	<0.01	-	-	-	<LOD	-	-	-	-	4.53	4.37	0.06	1.31	3.57	0.79	1.18	0.02	2.86	-32.94	0.47	0.15	0.03	5.93	215.80	0.05	0.04	0.00	6.44
QLO-1	6.66	1.00	1.66	24.98	565.94	16.15	16.20	0.44	2.72	-0.29	71.16	65.60	1.17	1.65	8.48	0.12	0.25	0.01	9.29	-50.27	<LOD	30.00	-	-	-	<LOD	220.00	-	-	-	3.51	3.60	0.04	1.08	-2.61	2.94	3.17	0.04	1.23	-7.37	1.00	0.62	0.04	3.57	61.00	0.09	-	0.00	3.62
SCO-1	7.49	2.72	1.52	20.30	175.48	15.37	13.67	0.36	2.34	12.41	64.18	62.78	1.02	1.59	2.23	0.10	0.21	0.01	8.76	-50.89	<LOD	630.00	-	-	-	<LOD	51.00	-	-	-	2.59	2.77	0.03	1.33	-6.59	2.45	2.62	0.04	1.62	-6.65	0.85	0.63	0.03	3.27	35.63	0.06	0.05	0.00	6.43
SDC-1	8.17	1.69	1.88	22.95	383.54	16.00	15.80	0.39	2.43	1.25	73.06	65.80	0.89	1.22	11.03	0.08	0.16	0.01	11.94	-50.42	<LOD	-	-	-	-	<LOD	32.00	-	-	-	3.16	3.28	0.04	1.33	-3.72	0.98	1.40	0.03	2.59	-29.81	1.32	1.01	0.02	1.78	30.28	0.10	-	0.00	4.30
Sdo-1	5.53	1.54	1.39	25.15	259.03	13.98	12.27	0.33	2.37	13.95	52.73	49.28	0.82	1.55	7.00	#VALUE!	0.11	-	-	-	4.29	5.35	0.07	1.73	-19.83	<LOD	190.00	-	-	-	3.50	3.35	0.05	1.32	4.37	0.45	1.05	0.01	3.30	-56.88	0.88	0.71	0.03	3.10	24.09	0.04	0.04	0.00	6.63
SGR-1	4.38	4.44	1.19	27.28	-1.44	6.97	6.52	0.16	2.32	6.87	33.48	28.24	0.51	1.52	18.57	<LOD	0.33	0.01	4.10	-13.67	1.33	1.53	0.02	1.73	-12.82	<LOD	32.00	-	-	-	1.87	1.66	0.02	1.13	12.40	10.85	8.38	0.10	0.96	29.45	0.46	0.26	0.02	4.58	72.76	0.04	0.03	0.00	5.63
W-2a	9.03	6.37	2.53	28.07	41.71	17.21	15.45	0.47	2.71	11.42	55.43	52.68	1.06	1.91	5.21	0.07	0.13	0.01	17.71	-43.53	<LOD	79.00	-	-	-	<LOD	190.00	-	-	-	0.29	0.63	0.01	3.27	-54.16	10.35	10.86	0.12	1.19	-4.72	1.30	1.06	0.04	2.95	22.86	0.14	0.17	0.01	3.62
Blank	4.38	-	1.11	25.27	-	<LOD	-	-	-	-	88.08	-	1.52	1.73	-	0.73	-	0.02	3.11	-	<LOD		-	-	-	<LOD		-	-	-	<LOD	-	-	-	-	<LOD	-	-	-	-	0.24	-	0.03	10.68	-	#VALUE!	-	-	-
[truncated: 12 more columns]
